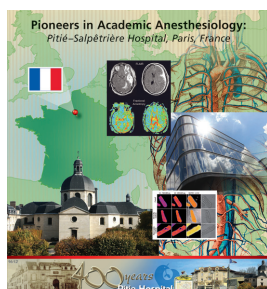

## ON THE COVER:

We continue our end-of-the-year special focus on an institution which has developed and maintained research excellence in the specialty. This year a majority of the December issue comes from the department of anesthesiology and critical care at Pitié-Salpêtrière in Paris, France, an institution which celebrated 400 years of patient care this year.

## THIS MONTH IN ANESTHESIOLOGY

9A

## EDITORIAL VIEWS

- 
**Contribution of the Pitié-Salpêtrière Hospital to French Anesthesiology** 1147  
*Pierre Coriat*
- 
**Do We Need to Monitor Cardiac Output during Major Surgery?** 1151  
*Jean-Louis Vincent and David Fagnoul*
- 
**Erythrocyte Transfusion: Remedy or Poison?** 1153  
*Yannick Le Manach and Summer Syed*
- Internet Use during Anesthesia Care: Does It Matter?** 1156  
*Karen B. Domino and Daniel I. Sessler*
- Understanding the Erythrocyte Storage Lesion** 1159  
*Gregory J. Kato*
- Lactate Clearance in the Acutely Traumatized Patient** 1162  
*Alan E. Jones*

## PERIOPERATIVE MEDICINE

- 
**Can Changes in Arterial Pressure be Used to Detect Changes in Cardiac Output during Volume Expansion in the Perioperative Period?** 1165  
*Yannick Le Manach, Christoph K. Hofer, Jean-Jacques Lehot, Benoît Vallet, Jean Pierre Goarin, Benoît Tavernier, and Maxime Cannesson*

Volume expansion–induced changes in arterial pressure are related to volume expansion–induced changes in cardiac output. However, only changes in pulse pressure variations accurately detect volume expansion–induced changes in cardiac output and have potential clinical applicability.

◆ Refers to This Month in Anesthesiology

◆ Refers to Editorial Views

 This article is from or about Pitié-Salpêtrière

 See Supplemental Digital Content

 CME Article

- ◆  **Relationship of Erythrocyte Transfusion with Short- and Long-term Mortality in a Population-based Surgical Cohort** 1175  
*Keyvan Karkouti, Thérèse A. Stukel, W. Scott Beattie, Susie Elsaadany, Rachel Berger, and Duminda N. Wijeyesundera*  
 The association of erythrocyte transfusion with mortality differed significantly when comparing hospitals with differing transfusion rates, as opposed to comparing transfused *versus* nontransfused patients. This discrepancy raises questions about the relationship between transfusion and mortality. *SUPPLEMENTAL DIGITAL CONTENT IS AVAILABLE IN THE TEXT*
- ◆ **Intraoperative Non-Record-keeping Usage of Anesthesia Information Management System Workstations and Associated Hemodynamic Variability and Aberrancies** 1184  
*David B. Wax, Hung-Mo Lin, and David L. Reich*  
 Anesthesia providers spent sizable portions of case time performing non-record-keeping applications on anesthesia information management system workstations. This use, however, was not independently associated with greater hemodynamic variability or aberrancies in patients during maintenance of anesthesia.
- ◆ **Inhaled Nitric Oxide Attenuates the Adverse Effects of Transfusing Stored Syngeneic Erythrocytes in Mice with Endothelial Dysfunction after Hemorrhagic Shock** 1190  
*Chong Lei, Binglan Yu, Mohd Shahid, Arkadi Beloiartsev, Kenneth D. Bloch, and Warren M. Zapol*  
 Resuscitation from hemorrhagic shock with stored erythrocytes is worse than resuscitation with fresh erythrocytes. Endothelial dysfunction exacerbates and inhaled nitric oxide ameliorates the adverse effects of murine resuscitation with stored erythrocytes.
-  ◆ **Impact of Perioperative Bleeding on the Protective Effect of  $\beta$ -Blockers during Infrarenal Aortic Reconstruction** 1203  
*Yannick Le Manach, Gary S. Collins, Cristina Ibanez, Jean Pierre Goarin, Pierre Coriat, Julien Gaudric, Bruno Riou, and Paul Landais*  
 Use of  $\beta$ -blockers was associated with a reduced frequency of postoperative myocardial necrosis. In case of severe bleeding, increased frequency of multiple organ dysfunction syndrome and death were observed.
-  **Interaction of Metabolic and Respiratory Acidosis with  $\alpha$  and  $\beta$ -adrenoceptor Stimulation in Rat Myocardium** 1212  
*Matthieu Biais, Romain Jouffroy, Aude Carillion, Sarah Feldman, Aude Jobart-Malfait, Bruno Riou, and Julien Amour*  
 Acute respiratory acidosis induced more pronounced negative inotropic effects than acute metabolic acidosis did, related to greater decrease in intracellular pH. The inotropic response to  $\beta$ -adrenoceptor stimulation was impaired only in metabolic acidosis.
-  **Prediction of Difficult Tracheal Intubation: Time for a Paradigm Change** 1223  
*Olivier Langeron, Philippe Cuvillon, Cristina Ibanez-Esteve, François Lenfant, Bruno Riou, and Yannick Le Manach*  
 Predicting difficult tracheal intubation is difficult because of the poor predictive capacity of individual signs and scores. Computer-assisted models using interactions among variables enable an accurate prediction with few patients in the inconclusive zone.
-  **Residual Neuromuscular Blockade Affects Postoperative Pulmonary Function** 1234  
*Gopalaiah Venkatesh Kumar, Anita Pramod Nair, Hanuman Srinivasa Murthy, Koppa Ramegowda Jalaja, Karnate Ramachandra, and Gundappa Parameshwara*  
 Residual neuromuscular block causes reduction in postoperative forced vital capacity and peak expiratory flow, indicating impaired respiratory muscle function. *SUPPLEMENTAL DIGITAL CONTENT IS AVAILABLE IN THE TEXT*
- Differences in microRNA Changes of Healthy Rat Liver between Sevoflurane and Propofol Anesthesia** 1245  
*Masashi Ishikawa, Shunsuke Tanaka, Masae Arai, Yuuki Genda, and Atsuhiko Sakamoto*  
 microRNA mediates posttranscriptional regulation of gene expression. The results of this study showed that anesthetic agents caused many microRNA expression changes and that the expression pattern was distinct for each anesthetic agent.

# **Epileptogenic Effect of Sevoflurane: Determination of the Minimal Alveolar Concentration of Sevoflurane Associated with Major Epileptoid Signs in Children**

1253

*Stephanie Gibert, Nada Sabourdin, Nicolas Louvet, Marie-Laure Moutard, Veronique Piat, Marie-Laurence Guye, Agnes Rigouzzo, and Isabelle Constant*

This study determines with the up-and-down method the minimal alveolar concentration of sevoflurane at which electroencephalographic epileptoid signs occur in anesthetized children, in 100% oxygen, in 50% oxygen – 50% nitrous oxide, or after a bolus of alfentanil.

# **Xenon Neuroprotection in Experimental Stroke: Interactions with Hypothermia and Intracerebral Hemorrhage**

1262

*Siyuan P. Sheng, Beilei Lei, Michael L. James, Christopher D. Lascola, Talaignair N. Venkatraman, Jin Yong Jung, Mervyn Maze, Nicholas P. Franks, Robert D. Pearlstein, Huaxin Sheng, and David S. Warner*

Postischemic xenon provided transient improvement in outcome from experimental focal ischemic stroke in rats. When combined with subtherapeutic hypothermia, benefit was sustained. Xenon alone decreased injury from intracerebral hemorrhage in mice.

## **CRITICAL CARE MEDICINE**

### **Prognostic Significance of Blood Lactate and Lactate Clearance in Trauma Patients**

1276

*Marie-Alix Régnier, Mathieu Raux, Yannick Le Manach, Yves Asencio, Johann Gaillard, Catherine Devilliers, Olivier Langeron, Bruno Riou*

Early (0–2 h) lactate clearance is a prognostic variable that provides additional information to initial blood lactate levels and scores and this information can be summarized using a categorical approach (–20%/h or lower, or not).

### **Elderly Age as a Prognostic Marker of 1-year Poor Outcome for Subarachnoid Hemorrhage Patients through Its Interaction with Admission Hydrocephalus**

1289

*Vincent Degos, Pierre-Antoine Gourraud, Virginie Trehel Tursis, Rachel Whelan, Chantal Colonne, Anne Marie Korinek, Frédéric Clarençon, Anne-Laure Boch, Aurélien Nouet, William L. Young, Christian C. Apfel, and Louis Puybasset*

An increasing number of elderly patients are treated for aneurysmal subarachnoid hemorrhage. In this observational study, elderly age and admission hydrocephalus predicted 1-yr poor outcome but elderly age without hydrocephalus did not.

SUPPLEMENTAL DIGITAL CONTENT IS AVAILABLE IN THE TEXT

### **Assessment of White Matter Injury and Outcome in Severe Brain Trauma: A Prospective Multicenter Cohort**

1300

*Damien Galanaud, Vincent Perlberg, Rajiv Gupta, Robert D. Stevens, Paola Sanchez, Eléonore Tollard, Nicolas Menjot de Champfleury, Julien Dinkel, Sébastien Faivre, Gustavo Soto-Ares, Benoît Veber, Vincent Cottenceau, Françoise Masson, Thomas Tourdias, Edith André, Gérard Audibert, Emmanuelle Schmitt, Danielle Ibarrola, Frédéric Daillier, Audrey Vanhauzenhuyse, Luaba Tshibanda, Jean-François Payen, Jean-François Lebas, Alexandre Krainik, Nicolas Bruder, Nadine Girard, Steven Laureys, Habib Benali, Louis Puybasset; for the Neuro Imaging for Coma Emergence and Recovery Consortium*

Existing methods to predict recovery after severe traumatic brain injury (TBI) lack accuracy. White matter damage, a key feature of TBI, can be identified and quantified with a magnetic resonance imaging (MRI) sequence called diffusion tensor imaging (DTI). The aim of this study is to determine the prognostic value of quantitative DTI in TBI. In a multicenter study, patients who remained comatose at least 7 days after TBI underwent brain MRI, including DTI in 20 preselected white matter tracts. Patients were evaluated at 1 yr with a modified Glasgow Outcome Scale. The DTI score had a sensitivity of 64% and a specificity of 95% for the prediction of unfavorable outcome. On the validation database, the area under the receiver operating characteristic curve was 0.80. White matter assessment with quantitative DTI increases the accuracy of long-term outcome prediction when compared with the available clinical and radiographic score.

-  **Diffusion Tensor Imaging to Predict Long-term Outcome after Cardiac Arrest: A Bicentric Pilot Study** 1311  
*Charles-Edouard Luyt, Damien Galanaud, Vincent Perlberg, Audrey Vanhaudenhuyse, Robert D. Stevens, Rajiv Gupta, Hortense Besancenot, Alexandre Krainik, Gérard Audibert, Alain Combes, Jean Chastre, Habib Benali, Steven Laureys, Louis Puybasset, for the Neuro Imaging for Coma Emergence and Recovery Consortium*

Diffusion tensor imaging is a promising tool to predict severe neurologic impairment in comatose survivors of cardiac arrest.

-  **Effects of Positive End-expiratory Pressure Titration and Recruitment Maneuver on Lung Inflammation and Hyperinflation in Experimental Acid Aspiration–induced Lung Injury** 1322  
*Aline M. Ambrosio, Rubin Luo, Denise T. Fantoni, Claudia Gutierrez, Qin Lu, Wen-Jie Gu, Denise A. Otsuki, Luiz M.S. Malbouisson, Jose O.C. Auler, Jr, Jean-Jacques Rouby, and the Experimental ARDS Study Group*

Lung histology after positive end-expiratory pressure titration and recruitment maneuvers was studied in pigs with acid aspiration–induced lung injury. Positive end-expiratory pressure titration induced lung inflammation and hyperinflation whereas recruitment maneuvers had no additional effects.

-  **Efficacy of High-dose Nebulized Colistin in Ventilator-associated Pneumonia Caused by Multidrug-resistant *Pseudomonas aeruginosa* and *Acinetobacter baumannii*** 1335  
*Qin Lu, Rubin Luo, Liliane Bodin, Jianxin Yang, Noël Zahr, Alexandra Aubry, Jean-Louis Golmard, Jean-Jacques Rouby, and the Nebulized Antibiotics Study Group*

Efficacy of high-dose nebulized colistin was studied in patients with ventilator-associated pneumonia caused by multidrug-resistant *Pseudomonas aeruginosa* and *Acinetobacter baumannii*. Nebulized colistin was noninferior to intravenous antibiotics for treating ventilator-associated pneumonia caused by susceptible strains.

## ■ CLASSIC PAPERS REVISITED

-  **Why Question Established Practice?** 1348  
*Francis M. James III*

This article is a revisiting of original material published as: James FM III, Griess FC, Kemp RA: An evaluation of vasopressor therapy for maternal hypotension during spinal anesthesia. *ANESTHESIOLOGY* 1970; 33:25-34. *SUPPLEMENTAL DIGITAL CONTENT IS AVAILABLE IN THE TEXT*

## ■ EDUCATION

### IMAGES IN ANESTHESIOLOGY

-  **Liver Contusion after Spine Fusion Surgery in Prone Position** 1352  
*David Cortier, Hugues Pascal-Mouscellard, and Armelle Nicolas-Robin*

- Cephalad Migration of Pediatric Caudal Epidural Catheters Associated with Change from Prone to Supine Position** 1353  
*Allan F. Simpao, Harshad G. Gurnaney, Alan Jay Schwartz, Lynne G. Maxwell, and Mohamed A. Rehman*

- Battery Ingestion Resulting in an Aortoesophageal Fistula** 1354  
*Sarah Jean Pae, Sara Helen Habte, John Joseph McCloskey, and Alan Jay Schwartz*

### ANESTHESIA LITERATURE REVIEW 1355

### CLINICAL CONCEPTS AND COMMENTARY

- Lüer's Lure: From an International Standards Perspective** 1358  
*Debra R. Milamed, Karen Brown, and Edward Murphy*

More than 200 deaths attributable to Luer-related misconnections have been reported. A redesign of Luer small-bore connectors is essential. The authors describe the international collaboration and regulatory aspects required for redesign and standardization.

This review describes advantages and limits of different experimental models of pneumonia. It reports experimental data concerning the use of nebulized antibiotics and draw lessons for clinical use in patients with ventilator-associated pneumonia.

## MIND TO MIND

Claire Poinsoot and Sophie Mayer

Maurice S. Albin

David A. August

## CASE REPORT

*John E. Fiadjo, Paul Stricker, Harshad Gurnaney, Akira Nishisaki, Anna Rabinowitz, Avraham Gurwitz, John J. McCloskey, and Arjunan Ganesh*

SUPPLEMENTAL DIGITAL CONTENT IS AVAILABLE IN THE TEXT

## CORRESPONDENCE

Lene Krenk and Henrik Kehlet

## In Reply

Madan M. Kwatra, Richard E. Moon, William D. White, Paula T. Trzepacz, and Sarah K. Rivelli

Andrey B. Petrenko, Misako Takamatsu, and Hiroshi Baba

### In Reply

Ken Solt, Jessica J. Chemali, Christa J. Van Dort, and Emery N. Brown

Annelies T. Moerman and Stefan G. De Hert

### In Reply

Kyung Y. Yoo, Hyejin Jeong, and JongUn Lee

Howard D. Palte and Steven Gayer

### In Reply

Clément Dubost, Agnès Le Gouez, Viridiana Jouffroy, Sandrine Roger-Christoph, Dan Benhamou, Frédéric J. Mercier, and Thomas Geeraerts

## Updated Pain Guidelines: What Is New?

Henrik Kehlet

1397

## In Reply

Michael A. Ashburn, Jeffrey L. Apfelbaum, Richard T. Connis, David G. Nickinovich,  
on behalf of the American Society of Anesthesiologists Task Force on Acute Pain Management  
in the Perioperative Setting

## Can Propofol Mimic Alcohol-related Pain in Patients with Hodgkin Lymphoma?

Omar Shakil, Jayant S. Jainandunsing, Jeniffer Gerstle, Stephanie B. Jones,  
and Feroze Mahmood

1399

## ANESTHESIOLOGY REFLECTIONS FROM THE PIERRE VIARS MUSEUM

### Epidural Anesthesia at the Pitié-Salpêtrière Hospital: From Fernand Cathelin (1901) to Jeanne Seebacher (1974)

Jean-Bernard Cazalà

1161

### Ombrédanne Inhaler 1908–1982(?)

Jean-Bernard Cazalà

1164

### The Henry and Jouvet Transfusion Apparatus 1934

Jean-Bernard Cazalà

1189

### Radium and Thorium Applications for the General Public: Unexpected Consequences of the Discovery from Pierre and Marie Curie

Jean-Bernard Cazalà

1202

### Paul Bert: From Physiology to Barometric Pressure

Jean-Bernard Cazalà

1244

### Musicotherapy in Anesthesia: Maxime Drossner, 1901

Jean-Bernard Cazalà

1252

## REVIEWS OF EDUCATIONAL MATERIAL

1400

## ANNOUNCEMENTS

1405

## ACKNOWLEDGMENT

1407

## CAREERS & EVENTS

27A

## INSTRUCTIONS FOR AUTHORS

The most recently updated version of the Instructions for Authors is available at [www.anesthesiology.org](http://www.anesthesiology.org). Please refer to the Instructions for the preparation of any material for submission to ANESTHESIOLOGY.

Manuscripts submitted for consideration for publication must be submitted in electronic format. The preferred method is via the Journal's Web site (<http://www.anesthesiology.org>). Detailed directions for submissions and the most recent version of the Instructions for Authors can be found on the Web site (<http://www.anesthesiology.org>). Books and educational materials should be sent to Michael J. Avram, Ph.D., Department of Anesthesiology, Northwestern University Feinberg School of Medicine, Ward Memorial Building, Room 13-199, 303 East Chicago Avenue, Chicago, IL 60611-3008. Requests for permission to duplicate materials published in ANESTHESIOLOGY should be submitted in electronic format, to the Permissions Department ([journalpermissions@lww.com](mailto:journalpermissions@lww.com)). All articles accepted for publication are done so with the understanding that they are contributed exclusively to this Journal and become the property of the American Society of Anesthesiologists, Inc. Statements or opinions expressed in the Journal reflect the views of the author(s) and do not represent official policy of the American Society of Anesthesiologists unless so stated. Advertising and related correspondence should be addressed to Advertising Manager, ANESTHESIOLOGY, Lippincott Williams & Wilkins, Two Commerce Square, 2001 Market Street, Philadelphia, Pennsylvania 19103 (Web site: <http://www.lww.com/advertisingratecards/>). Publication of an advertisement in ANESTHESIOLOGY does not constitute endorsement by the Society or Lippincott Williams & Wilkins, Inc. of the product or service described therein or of any representations made by the advertiser with respect to the product or service.
